# Supplementary material for: Prevalence, awareness, treatment, control of type 2 diabetes mellitus and risk factors in Chinese rural population: the RuralDiab study
Source: PubMed Central journal article supplement (PMC4980764; doi:10.1038/srep31426), 2016-08-11
Supplement: srep31426-s1.pdf [file srep31426-s1.pdf]

**Title**

Prevalence, awareness, treatment, control of type 2 diabetes mellitus and risk factors in Chinese rural population: the RuralDiab study

**Short title:**

Type 2 diabetes mellitus in rural China

**Authors:**

Xiaotian Liu<sup>1</sup>, Yuqian Li<sup>2</sup>, Lin-lin Li<sup>1</sup>, Luning Zhang<sup>1</sup>, Yongcheng Ren<sup>1</sup>, Hao Zhou<sup>1</sup>, Lingling Cui<sup>3</sup>, Zhenxing Mao<sup>1</sup>, Dongsheng Hu<sup>1,4</sup>, Chongjian Wang<sup>1</sup>

**Authors affiliations:**

<sup>1</sup> Department of Epidemiology and Biostatistics, College of Public Health, Zhengzhou University, Zhengzhou, Henan, *PR* China.

<sup>2</sup> Department of Clinical Pharmacology, School of Pharmaceutical Science, Zhengzhou University, Zhengzhou, Henan, *PR* China.

<sup>3</sup> Department of Nutrition and Food Hygiene, College of Public Health, Zhengzhou University, Zhengzhou, Henan, *PR* China.

<sup>4</sup> Department of Prevention Medicine, Shenzhen University School of Medicine, Shenzhen, *PR* China.

**\* Correspondence author**

Dr. Chongjian Wang

Department of Epidemiology and Biostatistics

College of Public Health, Zhengzhou University

100 Kexue Avenue, Zhengzhou, 450001, Henan, *PR* China

Phone: +86 371 67781452;

Fax: +86 371 67781868

E-mail: [tjwcj2005@126.com](mailto:tjwcj2005@126.com)

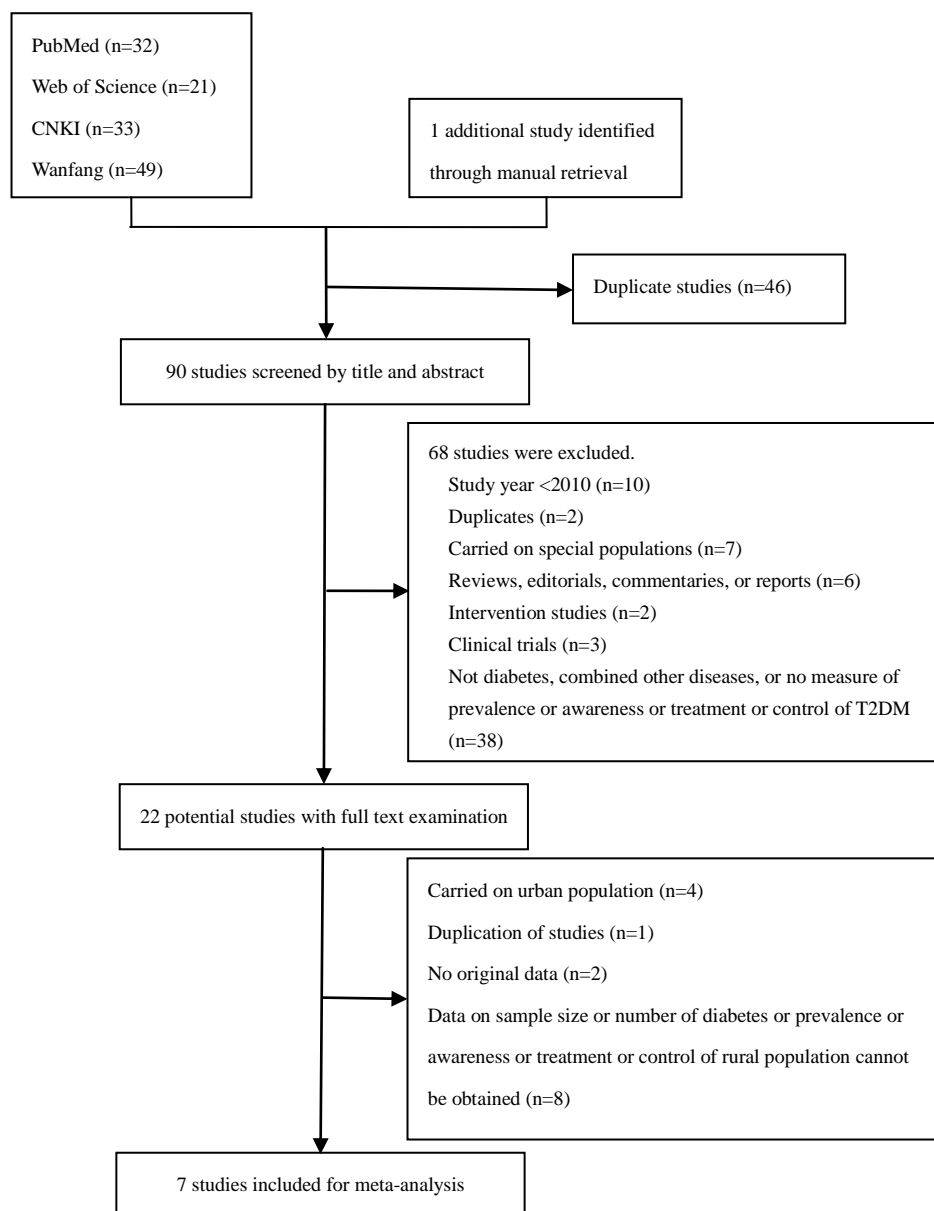

**Supplementary Figure S1 Flow diagram of included studies for meta analysis**

| First author & published year | Study location | Survey data   | Age range | Location    | Sampling method                               | Diagnostic criteria                                                                   | Diagnosis method               | Total sampling size (male/female) | Total case size (male/female) | Prevalence (male/female),% | Awareness (male/female),% | Treatment (male/female),% | Control (male/female),%           |
|-------------------------------|----------------|---------------|-----------|-------------|-----------------------------------------------|---------------------------------------------------------------------------------------|--------------------------------|-----------------------------------|-------------------------------|----------------------------|---------------------------|---------------------------|-----------------------------------|
| Wang 2016 <sup>19</sup>       | Jilin          | 2012          | 18-79     | Rural       | Multistage stratified cluster                 | FBG $\geq$ 7.0mmol/L/<br>anti-diabetic medications                                    | FPG                            | 9600<br>(4884/4716)               | 687<br>(339/348)              | 7.2<br>(6.9/7.4)           | 69.0<br>(60.2/77.6)       | 60.8<br>(51.6/69.8)       | <b>25.9</b><br><b>(21.2/30.5)</b> |
| Feng 2015 <sup>20</sup>       | Guizhou        | Oct.-Dec.2012 | 20-80     | Rural       | Cluster sampling                              | ADA2014                                                                               | FPG                            | 1060<br>(440/620)                 | 40<br>(21/19)                 | 3.77<br>(4.77/3.06)        | 30.00                     | 25.00                     | 7.50                              |
| Wang 2014 <sup>21</sup>       | Jilin          | 2013-2014     | 35~       | Rural       | Cluster sampling                              | FBG $\geq$ 7.0mmol/L/<br>anti-diabetic medications/<br>previous diagnosis of diabetes | FPG                            | 2600<br>(1179/1421)               | 190<br>(85/105)               | 7.3<br>(7.2/7.4)           | 54.7<br>(44.7/62.9)       | 48.9<br>(38.8/57.1)       | 14.7<br>(10.6/18.1)               |
| Wang 2014 <sup>22</sup>       | Jilin          | Jul.-Aug.2012 | 18-79     | Rural/urban | Multistage stratified random cluster sampling | China guideline for type 2 diabetes(2007)                                             | FPG                            | 8745                              | 923<br>(412/511)              | 10.6                       | 65.8<br>(59.5/76.5)       | 52.7<br>(50.2/63.8)       | 23.9<br>(18.9/28.0)               |
| Xu 2013 <sup>15</sup>         | 31 province    | 2010          | 18~       | Rural/urban | Multistage random cluster sampling            | ADA 2010                                                                              | FPG/OGTT/<br>HbA <sub>1c</sub> | 59730                             | 6521                          | 10.9                       | 27.3                      | 23.8                      | 8.7                               |
| Wang 2012 <sup>23</sup>       | Suzhou         | 2010          | 20-80     | Rural/urban | Multistage random cluster sampling            | WHO1999                                                                               | FPG                            | 23349                             | 1705                          | 7.30                       | 69.03                     | 51.96                     | 37.89                             |
| Zhang 2011 <sup>24</sup>      | Jiangsu        | 2010          | 35~       | Rural       | Multistage sampling                           | WHO1999                                                                               | FPG                            | 4634<br>(1883/2751)               | 194<br>(78/116)               | 4.19<br>(4.14/4.22)        | 80.41<br>(79.49/81.03)    | 69.07<br>(73.07/66.38)    | 27.32<br>(28.20/26.72)            |

WHO: World Health Organization; ADA: American Diabetes Association; FPG: fasting plasma glucose; OGTT: oral glucose tolerance test; HbA<sub>1c</sub>: glycated hemoglobin A<sub>1c</sub>.

**Supplementary Table S1 Characteristics of selected studies**
